# Supplementary material
Source: publisher figshare collection journal article supplement (https://karger.figshare.com/ndownloader/files/25038134)
Supplement: Supplementary file 1 [file 25038134]

**Materials and Methods**

We conducted an anonymous questionnaire study among Danish dermatologists, gastroenterologists and rheumatologists comprising 14 questions on the use of oral, IM and IA corticosteroids. The questions explored physicians’ use, opinion and experience of these medications for patients with psoriasis.

The questionnaire was distributed either by mail or e-mail. All private practitioners in the fields of dermatology, gastroenterology and rheumatology in Denmark were identified via an online database and were invited to participate by letter containing a reply envelope (Fig. 1). The answers received by letter were typed manually into REDCap (Research Electronic Data Capture). The chair of every hospital department in Denmark, which had physicians who specialized in one or more of the medical fields listed above, received an e-mail containing a link directly to the REDCap questionnaire. The chairs were asked to forward the e-mail to the relevant physicians at their department(s). A reminder e-mail was sent to the chairs about 40 days later.

Study data were collected and managed using REDCap electronic data capture tools hosted at Center for It, Medico og Telefoni (CIMT)/Region Hovedstaden [20, 21]. REDCap is a secure, web-based software platform designed to support data capture for research studies, providing: (1) an intuitive interface for validated data capture; (2) audit trails for tracking data manipulation and export procedures; (3) automated export procedures for seamless data downloads to common statistical packages; and (4) procedures for data integration and interoperability with external sources.

Descriptive statistical analysis was performed using RStudio version 1.2.1335.
